# Supplementary material for: Photochemical polymerization of thiophene derivatives in aqueous solution
Source: Royal Society of Chemistry journal article supplement (doi:10.1039/b408387c), 2004-01-01
Supplement: b408387c.doc [file b408387c.doc]

**Supplementary Information**

Potassium dichromate, 3-thiophenecarboxylic (TCA), 3-thiophenecacetic (TAA) and 3-thiopheneboronic acid (TBA) were purchased from Aldrich and used as received.

UV-vis spectra were recorded on a Shimadzu UV2100 spectrophotometer. Suspension of 10 mg/ml PTCA in DMF was stirred for 20 min at 80 C, filtered through the microfilter from the solid and its absorbance measured spectrophotometrically. A 1 mg/ml solution of TCA in DMF was used. PTCA was photodeposited as a solid film inside a polystyrene cuvette. For the IR spectra a Bruker Equinox55 FT-IR spectrometer was used and the samples were dispersed in KBr discs. Gel permeation chromatography (GPC) was carried out using a FPLC system (Pharmacia, Sweden) equipped with a UV detector, using DMF as eluent. The average molecular weights were calculated using a calibration curve of monodisperse polystyrene standards.

Mass spectrometry on the soluble fractions were carried out using VG ZAB 2SE double focusing magnetic sector instrument capable of high mass range (15000 mass units) and high resolution work. MALDI spectra were recorded using a Bruker Reflex III mass spectrometer and using a dihydroxybenzoic acid matrix.

SEM micrographs were obtained using a Oxford Instruments FEI XL30 SFEG. Ellipsometry was performed on a sample deposited inside a polystyrene cuvette using a UVISEL variable angle scanning instrument with a spot size of 0.5 mm and an integration time of 0.2 s. Atomic force microscope (AFM) images were obtained using the Quesant Resolver model (Quesant Instrument Corporation, Hills, CA). Samples were scanned in wave-mode, at a scan rate of 2 Hz and 400-pixel resolution.

UV spectra of polythiophene acetic acid (PTAA) and polythiophene boronic acid (PTBA).
